# Supplementary material
Source: Springer Nature journal article supplement (https://www.springermedizin.de/resource/supplementary/12913_2013_3397_MOESM2_ESM.pdf/9532720)
Supplement: MOESM2 [file 9532720]

University  
Hospital

2008 Quarter 1  
Measure 1

2008 Quarter 3  
Start of quality improvement

2010 Quarter 3  
Measure 2

County  
Hospital

2009 Quarter 1 and 3  
Measure 1

2009 Quarter 3  
Start of quality improvement\*

2010 Quarter 3  
Start of quality improvement\*\*

2011 Quarter 2  
Measure 2
